# Supplementary material for: High porosity microspheres with functional groups synthesized by thiol–yne click suspension polymerization
Source: Royal Society of Chemistry journal article supplement (doi:10.1039/c6py01824f), 2016-01-01
Supplement: c6py01824f1.pdf [file c6py01824f1.pdf]

*Supporting Information for*

## **High porosity microspheres with functional groups synthesized by thiol-yne click suspension polymerization**

**Shengying Cai, †<sup>a</sup> Zhulin Weng, †<sup>a</sup> Yaochen Zheng, \*<sup>a,b</sup> Bo Zhao,<sup>a</sup> Zhengguo Gao<sup>a,b</sup> and Chao Gao\*<sup>a</sup>**

<sup>a</sup> *MOE Key Laboratory of Macromolecular Synthesis and Functionalization, Department of Polymer Science and Engineering, Key Laboratory of Adsorption and Separation Materials & Technologies of Zhejiang Province, Zhejiang University, Hangzhou 310027, P. R. China.*

<sup>b</sup> *Department of Polymer Science and Engineering, College of Chemistry and Chemical Engineering, Yantai University, 30 Qingquan Road, Yantai 264005, P. R. China.*

**Figure S1.** Optical photographs of (a) epoxy-, (b) thioacetate-, (c) carboxy-, (d) tert-amine-containing microspheres.

**Figure S2.** UV-Vis spectra of different  $\text{Cu}^{2+}$  ion contents in DMF solutions.

**Figure S3.** Work curve for DMF solutions of copper sulfate.

**Figure S4.** DSC results of liner epoxy-containing polythioether and various cross-linked microspheres prepared by thiol-click chemistry.

**Figure S5.** Freundlich adsorption isotherm models for the absorption of  $\text{Cu}^{2+}$  ions on the thioacetate-functional microspheres.

**Table S1.** Pore property of epoxy-containing microspheres (35 wt % PEG) measured by mercury porosimeter.

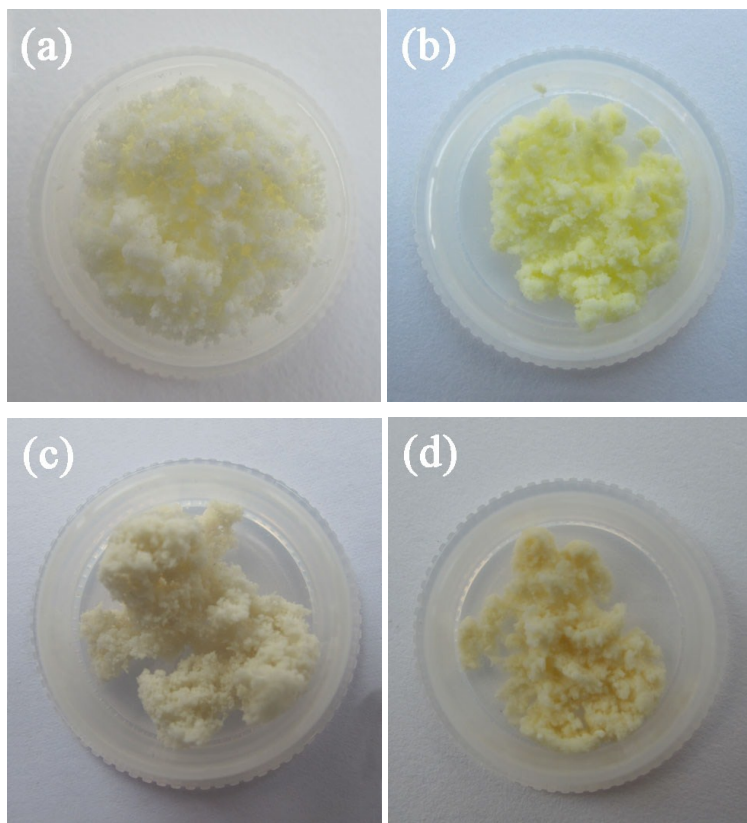

**Figure. S1**

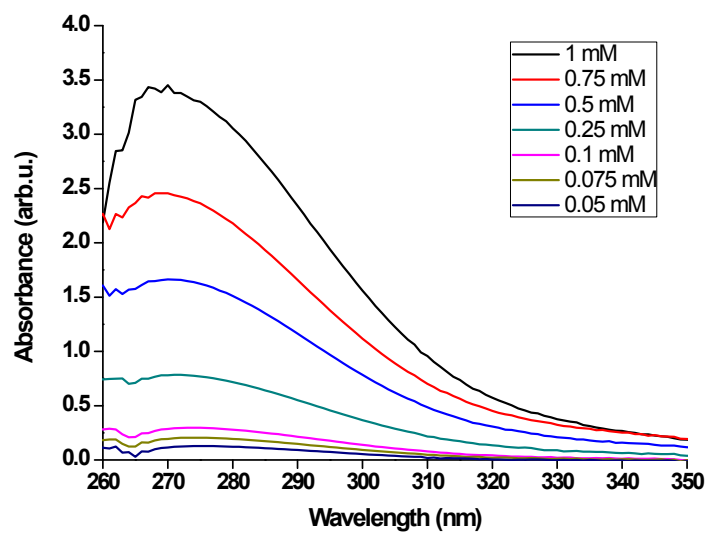

Figure. S2

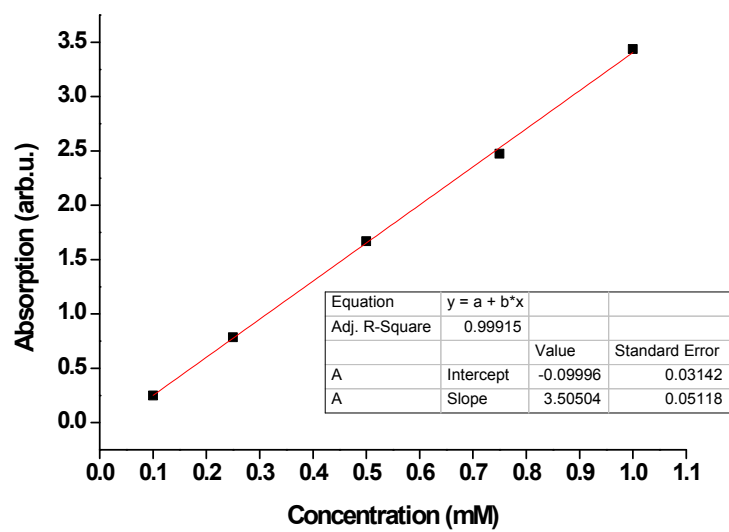

Figure. S3

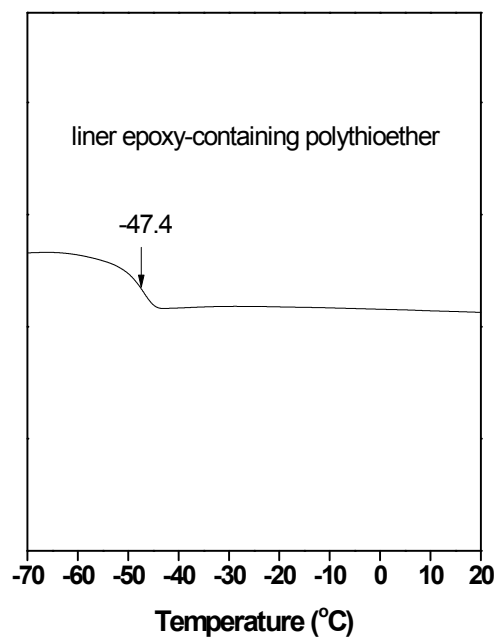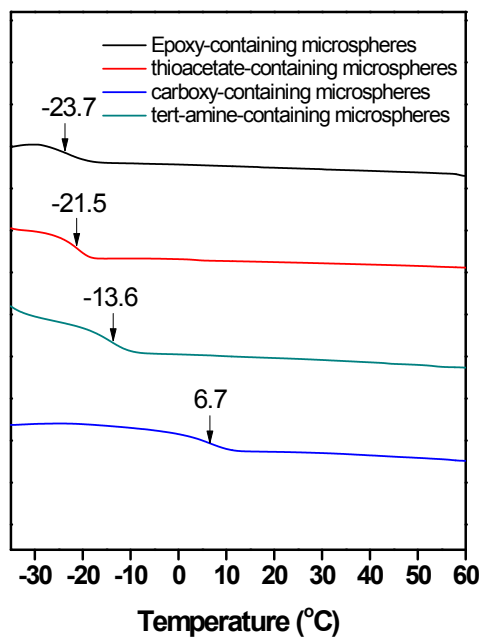

Fig. S4

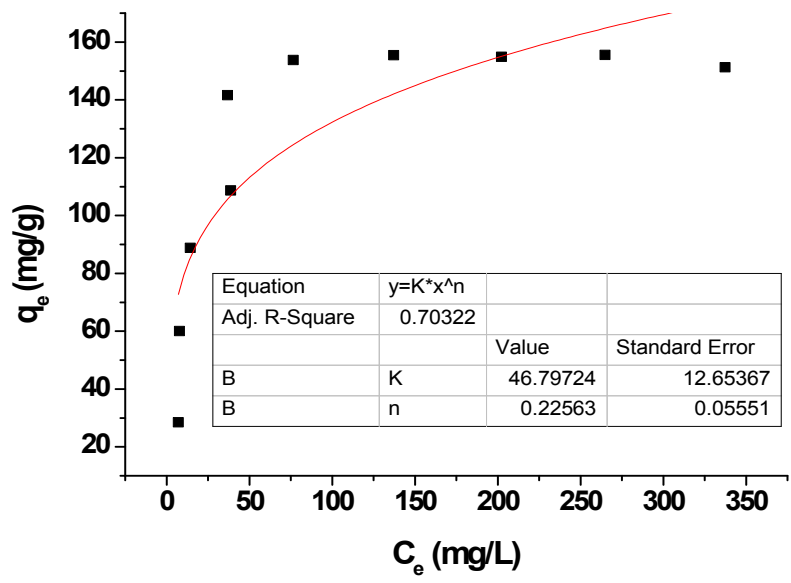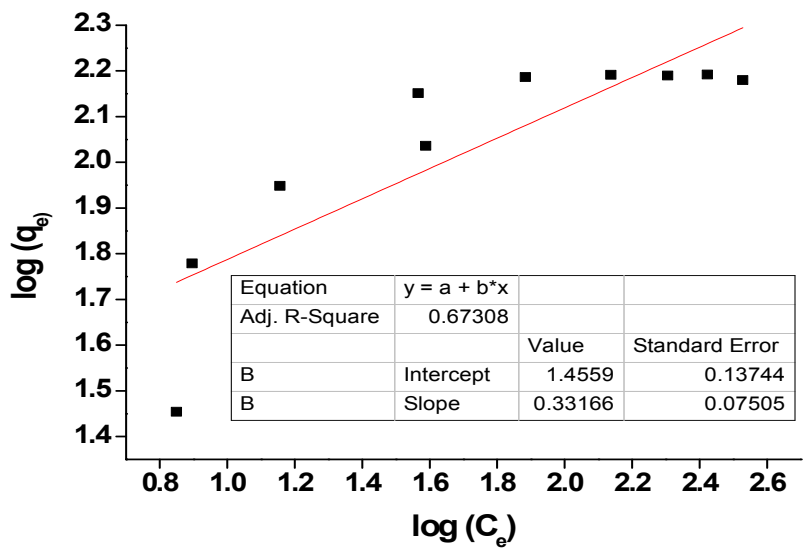

Figure. S5

**Table S1**

| Total intrusion volume    | Total pore area                      | Average pore diameter | Apparent density          | Porosity |
|---------------------------|--------------------------------------|-----------------------|---------------------------|----------|
| 1.5124 mL g <sup>-1</sup> | 7.778 m <sup>2</sup> g <sup>-1</sup> | 0.78 μm               | 1.1040 g mL <sup>-1</sup> | 62.45 %  |
